# Supplementary material
Source: PubMed Central journal article supplement (PMC7709864)
Supplement: NIHMS1626986-supplement-1.pdf [file NIHMS1626986-supplement-1.pdf]

**Supplementary Table 1.** Summary of donor T cells used for CAR T cell generation and response to anti-PD1 antibody treatment *in vitro* and *in vivo*.

| Donor              | T cell source | Manufacturing methods <sup>1</sup> | CAR | CD4:CD8 | PD1 <sup>+</sup> /CD8 <sup>2</sup> | PD-L1>1% | CAR constructs <sup>3</sup> | Cytotoxicity +/-PD <sub>4</sub> ( <i>P</i> values) | In vivo activity +/-PD <sub>5</sub> ( <i>P</i> values) |
|--------------------|---------------|------------------------------------|-----|---------|------------------------------------|----------|-----------------------------|----------------------------------------------------|--------------------------------------------------------|
| Patient 1-1 (ATC)  | PBMC          | Tissue culture                     | 18% | 71:24   | 96%                                | yes      | RR                          | Yes ( <i>P</i> < 0.001)                            | n.d.                                                   |
| Patient 1-2 (ATC)  | PBMC          | Tissue culture                     | 20% | 71:24   | 96%                                | yes      | RR                          | Yes ( <i>P</i> < 0.001)                            | n.d.                                                   |
| Patient 2 (ATC)    | PBMC          | Tissue culture                     | 64% | 59:39   | 99%                                | yes      | mAS                         | No ( <i>P</i> > 0.5)                               | n.d.                                                   |
| Patient 3-1 (PDTC) | PBMC          | Tissue culture                     | 61% | 77:20   | 40%                                | no       | mAS                         | No ( <i>P</i> > 0.5)                               | n.d.                                                   |
| Patient 3-2 (PDTC) | PBMC          | Tissue culture                     | 56% | 77:20   | 40%                                | no       | RR                          | No ( <i>P</i> > 0.5)                               | n.d.                                                   |
| Patient 4 (WDPTC)  | PBMC          | Tissue culture                     | 55% | 65:26   | 16%                                | no       | RR                          | Yes ( <i>P</i> < 0.05)                             | n.d.                                                   |
| Healthy 1          | Leukopak      | Prodigy (CAR T-1)                  | 75% | 85:12   | 41%                                | n.a.     | mAS                         | Yes ( <i>P</i> < 0.05)                             | Yes ( <i>P</i> < 0.01)                                 |
| Healthy 2          | Leukopak      | Prodigy (CAR T-2)                  | 81% | 45:51   | 24%                                | n.a.     | mAS                         | No ( <i>P</i> > 0.5)                               | No ( <i>P</i> > 0.5)                                   |
| Healthy 3          | Leukopak      | Prodigy (CAR T-3)                  | 71% | 42:53   | 26%                                | n.a.     | mAS                         | No ( <i>P</i> > 0.5)                               | No ( <i>P</i> > 0.5)                                   |

1. Two different manufacturing methods. Refer to Methods for details.

2. Refer to Figures 2 and 4A

3. RR denotes R6.5 scFv based CAR design (1), and mAS denotes CAR design with LFA-1 I domain with F292A mutation (2).

4. Determined against 8505C cell line at 50% cell death. Refer to Fig. 3C.

5. Determined by the tumor burden reduction at weeks 3-4 post-xenograft.

n.a. = not applicable; n.d. = not determined.
