# Supplementary material
Source: PubMed Central journal article supplement (PMC7709864)
Supplement: NIHMS1626986-supplement-2.pdf [file NIHMS1626986-supplement-2.pdf]

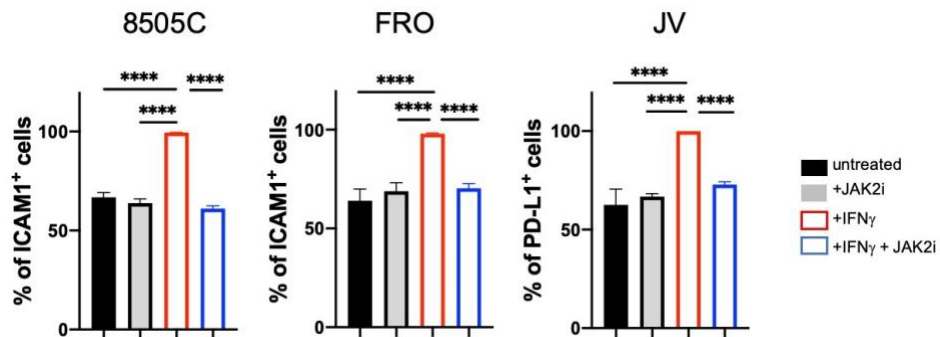

**Supplementary Figure 1. Expression of ICAM1 and PD-L1 in anaplastic thyroid tumor cell lines.**

The frequencies of ICAM1-positively stained 8505C and FRO cells and PD-L1-positively stained JV cells were determined by flow cytometry analysis. IFN $\gamma$  (200 U/ml) with or without JAK2 inhibitor AZD1480 (1  $\mu$ M) were added for 48 hours to examine its effect on ICAM1 and PD-L1 expression. Data represents mean  $\pm$  sem.  $n$  = 4 -10 replicates. The analysis was repeated independently at least three times.
