# Supplementary material
Source: PubMed Central journal article supplement (PMC7709864)
Supplement: NIHMS1626986-supplement-4.pdf [file NIHMS1626986-supplement-4.pdf]

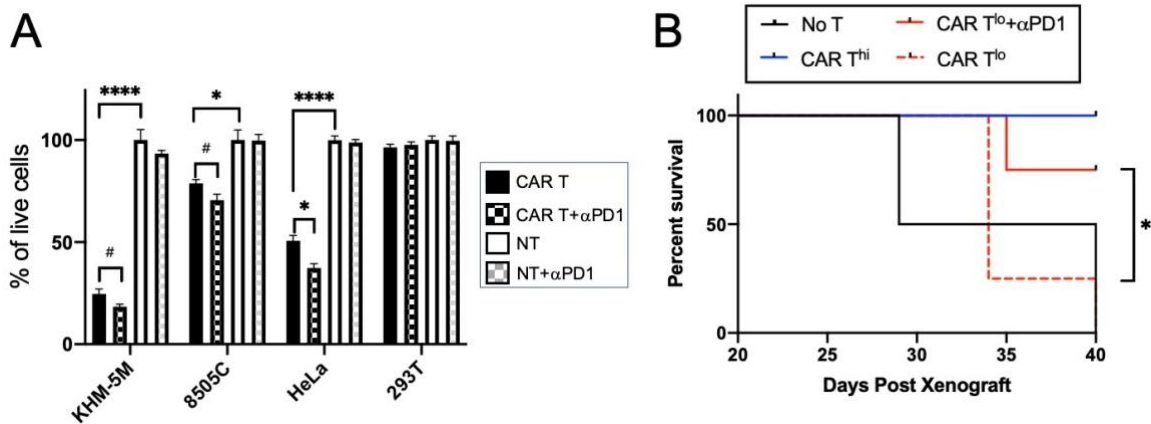

**Supplementary Figure 3. PD1 inhibition enhances survival benefit of CAR T treatment in KHM-5M xenografts.**

(A) E:T assays were carried out with CAR T-1 and NT cells alone or with combination of anti-PD1 antibody (5 µg/ml) ( $n = 3$ ; #,  $P = 0.06$  for KHM-5M, 0.054 for 8505C; \*,  $P < 0.05$ ; \*\*\*\*,  $P < 0.0001$  by one-way ANOVA test). The analysis was independently repeated at least two times.

(B) Survival curve of animals with KHM-5M xenografts with various treatments and no treatment is shown ( $n = 4$  for all groups except for CAR T<sub>hi</sub> group, which is  $n = 3$ ; \*,  $P < 0.05$  by the log-rank test). NSG mice with KHM-5M xenografts were established with injecting  $0.5 \times 10^6$  cells intravenously. CAR T<sub>hi</sub> group was injected with  $5 \times 10^6$  ICAM1-CAR T (mAS) cells. CAR T<sub>lo</sub> group was treated with  $0.75 \times 10^6$  CAR T cells either with anti-PD1 antibody administration (+) or alone (-). Administration of CAR T (i.v.) and αPD1 antibody (i.p.) started ~5 days after xenograft. CAR T was a single treatment, while αPD1 antibody (150 µg/mouse) administration was twice a week for 5 weeks.
